# Supplementary material for: A Comprehensive Quality Evaluation Method Based on C30-HPLC and an Analytic Hierarchy Process for the Chinese Herbal Formula, Erzhiwan
Source: PubMed Central journal article supplement (PMC6222504; doi:10.3390/molecules23082045), 2018-08-15
Supplement: molecules-23-02045-s001.pdf [file molecules-23-02045-s001.pdf]

A Comprehensive Quality Evaluation Method Based on C30-HPLC and  
an Analytic Hierarchy Process for the Chinese Herbal Formula, Erzhiwan

Ying Nie<sup>1</sup>, Weifeng Yao<sup>2\*</sup>.

1. School of Pharmacy, China Pharmaceutical University, Nanjing 210009, China;  
nieyingcpu@163.com (Y.N.)
2. School of Pharmacy, Nanjing University of Chinese Medicine, Nanjing 210023,  
China;  
yaowf@njucm.edu.cn (W.F.Y)

*\*Corresponding Author:* yaowf@njucm.edu.cn (W.F.Y)

Tel.: +86-25-85811053 (W.F.Y)

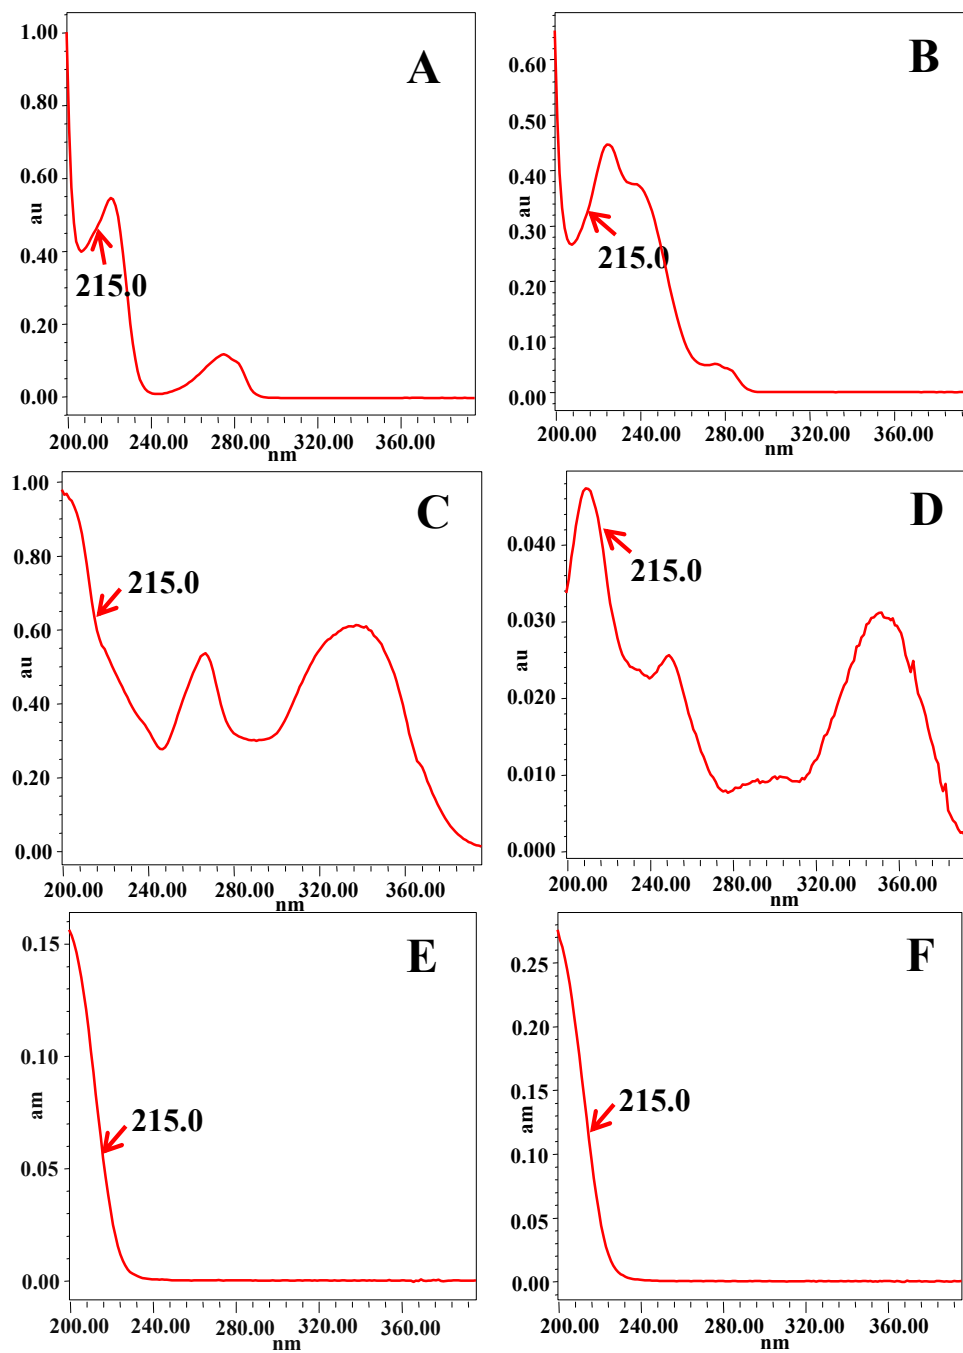

Figure.S1. The UV spectrums of salidroside (A), specnuezhenide (B), ligustroflavone (C), wedelolactone (D), oleanic acid (E) and ursolic acid (F).

Table S1. Pair comparison evaluation scale.

| Importance | Definition              | Explanation                                                                                                |
|------------|-------------------------|------------------------------------------------------------------------------------------------------------|
| 1          | Equal importance        | Two activities contribute equally to the subject                                                           |
| 3          | Weak importance         | One activity is slightly more important than the other                                                     |
| 5          | Essential importance    | One activity is exceedingly more important than the other                                                  |
| 7          | Demonstrated importance | One activity has been practically demonstrated as more important.                                          |
| 9          | Absolute importance     | Evidence favors one activity as more important than the other of the highest possible order of affirmation |
| 2, 4, 6, 8 | Intermediate values     | When compromise is needed                                                                                  |

Table S2. Random index for consistency analysis of expert raters.

| <i>N</i> | 3    | 4    | 5    | 6    | 7    | 8    | 9    |
|----------|------|------|------|------|------|------|------|
| RI       | 0.58 | 0.90 | 1.12 | 1.24 | 1.32 | 1.41 | 1.45 |

Where *N* is the order of comparison matrix.

Table S3. The DPPH clearance rate of EZW samples at different concentrations (n=3, %).

|       | 0.01 mg·mL <sup>-1</sup> | 0.04 mg·mL <sup>-1</sup> | 0.16 mg·mL <sup>-1</sup> | 0.63 mg·mL <sup>-1</sup> | 2.50 mg·mL <sup>-1</sup> |
|-------|--------------------------|--------------------------|--------------------------|--------------------------|--------------------------|
| EZW-1 | 25.77                    | 31.02                    | 45.56                    | 82.67                    | 93.14                    |
| EZW-2 | 29.66                    | 30.45                    | 47.26                    | 81.91                    | 93.83                    |
| EZW-3 | 33.58                    | 34.19                    | 51.29                    | 83.43                    | 93.72                    |
| EZWP  | 27.53                    | 32.07                    | 39.16                    | 69.79                    | 89.62                    |
